1 **Assessment of the implementation of iron and folic acid tablets supplementation to in-**  
2 **school girls in Nanumba South District of Northern Region, Ghana**

3 Nayina Bakunboa Isaac Razak<sup>1\*</sup>, Robert Kogi<sup>2,3</sup>, Jean Claude Ndayishimiye<sup>3</sup> & Samuel Yaw  
4 Opoku<sup>4</sup>

5 <sup>1</sup>Ghana Health Service, Nanumba South District Health Directorate, P. O. Box 7, Wulensi

6 <sup>2</sup>Ghana Health Service, Asunafo South District Health Directorate, P. O. Box 22, Kukuom

7 <sup>3</sup>School of Public Health, College of Health Sciences, University of Ghana, Legon, Accra,

8 <sup>4</sup>School of Public Health and Allied Sciences, Catholic University of Ghana

9 **\*Corresponding Author:** Nayina Bakunboa Isaac Razak

10 **Email:** [nayinazak82@gmail.com](mailto:nayinazak82@gmail.com)

11

## 12 **Abstract**

13 Iron deficiency is a leading cause of morbidity and mortality among adolescent girls 10–  
14 19 years of age globally. Despite the free weekly iron and folic acid supplementation, prevalence  
15 of anaemia among adolescent females still between 24% to 64.6%. This study sought to identify  
16 the factors affecting the implementation of iron and folic acid program to a school-based anaemia  
17 reduction in the Nanumba South District, Northern Region, Ghana.

18 A cross-sectional analytical study was carried out. And a simple random sampling method  
19 was used to select the schools and the adolescent girls, while purposive sampling was used to select  
20 school health coordinators and health staff. The outcome variable was IFA compliance and  
21 exposures were knowledge on anaemia and IFAS program, as well as socio-demographic factors  
22 (Age, marital status, level of education, gestational age, parity, gestation age, and occupation).  
23 Adolescent girls who consumed at least five tablets of the expected dose in the previous 7 weeks  
24 (1 tablet per week) which is equivalent to consuming 70% of the expected dose before the day of  
25 the data collection were considered compliant. Respondents who were able to get “1” in all the  
26 four knowledge questions were considered to have good level of knowledge. Occupation level of  
27 parents was self-identified by the respondents. Multivariable logistic regression analysis was  
28 performed to identify the predictors of the outcome variable. Significance level was set at  $p < 0.05$ .

29 The level of knowledge about benefits of iron and folic acid supplementation was generally  
30 high in this study (88.0%). Overall, the majority (65.7%) of the respondents complied with iron  
31 and folic acid supplementation. Father’s occupational level was the only variable, which was  
32 significantly associated with adolescent girls’ IFA consumption compliance ( $p = 0.002$ ). The odds  
33 of compliance among respondents who were 17-25 years was significantly 56% times lower  
34 compared to those who were 10-16 years (AOR = 0.44 (95% CI: 0.21-0.96)  $p = 0.038$ ). Adolescent

35 girls of Kokomba ethnic group were also 83% less likely to comply with iron and folic acid  
36 consumption (AOR = 0.17 (95% CI: 0.03-0.89) p = 0.036).

37 In conclusion, the study highlighted high compliance with the IFA among respondents,  
38 emphasizing the critical roles of teachers and health workers in counseling, monitoring, and  
39 supervision, while identifying age 17-25 years and Kokomba ethnic group being less significant  
40 factors influencing compliance. It is recommended that the role of teachers and health workers in  
41 the IFAS program should be strengthened, while addressing barriers to compliance among older  
42 adolescents and engaging families.

## 43 **Introduction**

44 Iron deficiency anaemia in adolescents remains a major public health challenge. The  
45 prevalence of nutritional anaemia among adolescent girls in developing countries, particularly in  
46 low- and middle-income countries (LMICs), is alarmingly high. In West and Central Africa, the  
47 prevalence of adolescent anaemia remained high at 45% over the last two decades [1]. A broader  
48 analysis across twenty-four (24) LMICs indicated anaemia pooled prevalence of 41.58% among  
49 young women aged 15-24 [2].

50 While adolescence is a time of remarkable growth and development, iron deficiency can  
51 impair growth and delay sexual menstruation among young girls [3]. During this time, about 20%  
52 of final adult height and 50% of adult weight are attained [4]. Due to their increased nutritional  
53 requirements during growth and development as well as menstrual blood loss, adolescent girls are  
54 more likely to develop iron deficiency related anemia [5]. To prevent anaemia and maintain growth  
55 during adolescence, the weekly intermittent iron and folic acid supplementation (IFA) has been  
56 recommended by the World Health Organization [6]. It entails providing adolescent girls a  
57 supplement once each week for a specific amount of time that contains both iron and folic acid  
58 [7].

59 Despite the free weekly iron and folic acid supplementation, prevalence of anaemia among  
60 adolescent females remains between 24% [8] to 64.6% [9]. Anaemia has complex and long-term  
61 consequences, especially in adolescent girls, and it is also related to children morbidity and  
62 mortality [10]. To encourage the intake of IFA tablets across many settings and populations, these  
63 are provided free of charge utilizing school institutions as a distribution channel for adolescent  
64 girls as one of the target groups. In Ghana, the Girls' Iron-Folic acid Tablet Supplementation  
65 (GIFTS) program, which is an integrated health and nutrition education program with intermittent

66 weekly IFA supplementation, was designed to reach adolescent girls ages 10–19 years  
67 simultaneously through two delivery platforms: schools and local health centers. In October 2017,  
68 the first phase of the program began in the Brong-Ahafo, Northern, Upper East, and Volta regions  
69 of Ghana [11].

70 The success of the iron supplementation program depends largely on the effectiveness of a  
71 delivery system and the compliance of the target recipients. The school is the most efficient  
72 channel for the delivery of health services to schoolchildren and is considered a high-priority area  
73 for public health education [12, 13,14]. However, the effectiveness of programs that aim to  
74 supplement iron has been questioned because of the low efficiency of health services and poor  
75 compliance of the target recipients [15]. Undeniably, there have been several studies of the barriers  
76 and facilitators to compliance with IFA supplementation in the GIFTS program in many settings  
77 in Ghana [16,17,18]. Unfortunately, none of these studies has been conducted among adolescent  
78 girls in the Nanumba South District. Hence, this study was carried out to assess the factors affecting  
79 the implementation of IFA program to a school-based anaemia reduction program with weekly  
80 iron and folic acid supplementation in the Nanumba South District.

## 81 **Methods**

### 82 **Study Design**

83 A school-based cross-sectional analytical study was used in carrying out this study. This  
84 design was chosen because we intended to gain immediate knowledge and information on IFAS  
85 in the Nanumba South District.

## 86 **Study Population**

87 All Adolescent girls attending junior high school in the Nanumba South District were the  
88 source population. The study population consisted of randomly sampled girls who were attending  
89 junior high school in the study area in the third term of the 2022/2023 academic year. Junior high  
90 school students were used because they are typically adolescents, who are at a critical growth stage  
91 with increased nutritional demands [19]. In addition, adolescents, particularly girls, are more prone  
92 to iron deficiency anaemia due to factors such as menstruation and rapid physical growth  
93 [20,21,22].

94 Girls who were absent and those who declined to participate in the study were excluded.  
95 School health coordinators of the randomly selected schools and health staff were also selected to  
96 participate in the study.

## 97 **Sample Size Determination and Sampling Technique**

98 The sample size was determined using Cochran's formula  $N = (Z^2 \times p(1 - p))/d^2$  [23] with  
99 95% confidence interval and 5% margin of error with compliance rate of 26.2% [16] as reported  
100 in the Tamale Metropolis, where N is the sample size, Z (statistic) = 1.96, p (compliance rate) =  
101 0.262, and d (margin of error) = 0.05:

$$102 \quad N = \frac{(1.96)^2 \times 0.262(1 - 0.262)}{(0.05)^2} = 294.519$$

103 The calculated sample size was therefore 295. After adding a 10% non-response rate, the  
104 final sample size obtained was 324.

105 Simple random sampling was used to select the schools and the adolescent girls, while  
106 purposive sampling was used to select the school health coordinators and health staff. The lottery

107 method was used to select the schools. The names of all junior high schools in the district were  
108 written on pieces of paper and placed in a bowl. With blind draw, the schools were randomly  
109 picked one by one without replacement until the expected number of 20 schools were reached. The  
110 final sample size of 324 was proportionally allocated to the 20 schools based on the enrolment of  
111 girls in each school. The study respondents were selected from each class through simple random  
112 sampling using random numbers generated for each class using the girls' attendance register.  
113 Twenty-one school health coordinators in the selected schools and 14 health staff in charge of the  
114 school health services (6 oversaw two schools each) were purposively sampled to participate in  
115 the study. The proportional allocation of the sample size based on school enrolment led to the  
116 application of sampling weights during analysis to ensure that larger schools (with more girls) did  
117 not unduly influence results compared to smaller schools.

## 118 **Study Variables**

119 The dependent variable was IFA compliance level (intake). The independent variables  
120 were knowledge on anaemia, knowledge on the IFAS program, socio-demographic factors of girls  
121 (e.g. age, marital status, level of education, and occupation of parents).

## 122 **Data Collection Tool and Technique**

123 A structured pre-tested questionnaire was used to collect the data with the help of  
124 interviewer-assisted questionnaire administration. The data collection tool was adopted and  
125 modified from similar published studies [24, 25, 26,27]. Pretesting of the data collection tool was  
126 done in Nanumba North District, since it shares similar characteristics with the study area.

127 A prior permission was sought from headmasters and health coordinators of the selected  
128 schools through formal writing. The questionnaire, which was mostly closed-ended with multiple  
129 choice and dichotomous responses, was divided into sections and administered to both adolescent  
130 girls and teachers as well as health staff. The expected duration for participation in this study was  
131 15 to 20 minutes per respondent, and the entire duration for the data collection and the study started  
132 on 1<sup>st</sup> August 2022 to 28<sup>th</sup> February 2023.

133 One-day training was organized for the data collectors on 26<sup>th</sup> July 2022. They were trained  
134 on the objectives of the study, how to ensure confidentiality of the data, and how to fill the  
135 questionnaire. The data collectors were also trained on how to initiate the interview process by  
136 reading the informed consent to every respondent for voluntary participation. After data collection,  
137 the investigators reviewed each questionnaire to ensure the accuracy and completeness of the data  
138 collected.

## 139 **Data Analysis**

140 The data was coded and analyzed using STATA 17.0 (Stata Corp, College Station, TX).  
141 Sociodemographic characteristics, level of compliance, and knowledge of anaemia and IFAS  
142 program was first presented in text, figures, and tables using descriptive statistics such as  
143 frequencies and percentages. Bivariate logistic and Multivariate logistic regression tests were  
144 performed to determine the association between the sociodemographic characteristics, knowledge  
145 on anaemia and IFAS program and the outcome variable (compliance level). Crude and adjusted  
146 odds ratios with their respective confidence intervals (95%) were computed to determine the  
147 strength of association of each variable.



148 IFAS compliance level was measured based on the number of tablets consumed in the past  
149 7 weeks to the conduct of this study. Adolescent girls who consumed at least five tablets of the  
150 expected dose in the previous 7 weeks (1 tablet per week) which is equivalent to consuming 70%  
151 of the expected dose before the day of the data collection were considered compliant. Adolescent  
152 girls who consumed less than five tablets were considered noncompliant [28]. Records kept by the  
153 school health coordinators were used to validate each respondent's compliance status.

154 A correct response was scored "1" for respondents who answered at least one cause (s) of  
155 anaemia, signs and symptoms of anaemia, consequences of anaemia, and prevention of anaemia  
156 correctly and an incorrect response was scored "0" on anaemia. Respondents who were able to get  
157 "1" in all the four questions were considered to have good level of knowledge. Knowledge of the  
158 IFAS program was scored "1" for good knowledge and an incorrect answer was scored "0" for  
159 poor knowledge item on why they are given the tablet, benefits of taking IFA tablet, food that  
160 inhibits iron and folic acid absorption, side effects of taking IFA tablets, and why girls are given  
161 the iron and folic acid tablet. Respondents who answered correctly at least four question (s) were  
162 those considered having good knowledge on the IFAS program while those who scored below the  
163 four marks were considered as having poor knowledge [29]. The study sought to identify and  
164 categorize levels of knowledge among respondents on both anaemia and IFA program, and  
165 acknowledging at least one correct answer allowed for the recognition of some baseline  
166 understanding. P-value less than 0.05 was used as cut-off point to see the presence of statistically  
167 significant association.

## 168 **Ethical Considerations**

169 Ethical clearance for the study was sought from the Ghana Health Service Ethics Review  
170 Committee (Protocol number: **GHS-ERC:043/09/22**). Approval letter for the study was granted

171 by the Nanumba South District Health Directorate of Ghana Health Service, while permission to  
172 go into the school was obtained from the Nanumba South District Education Office. Written  
173 informed assent was obtained from underage participants (those below 17 years) in their schools  
174 while another written informed consent was obtained from the parents of the girls. Selected girls  
175 were given the informed consent forms to send home for their parents to thumbprint/sign signaling  
176 their agreement for their child to participate in the study.

## 177 **Results**

### 178 **Socio-demographic Characteristics of Respondents**

179 From Table 1, the total number of respondents (adolescent girls) in this study was 324 with a mean  
180 age of 16.15 ( $\pm 2.06$ ). More than half (56.8%) of the respondents were within the age range of 10  
181 to 16 years with a little above two-third (68.2%) in form 2. Also, more than half (57.7%) of the  
182 respondents were from Kokomba ethnic group, while some 54.9% of them were affiliated to the  
183 Christian religion. Most (81.2%) of the respondents' mothers had no formal education. In addition,  
184 less than three-quarters (71.0%) of the respondents' fathers had no formal education. Finally, while  
185 a little above two-third (67.3%) of the mothers were farmers, majority (80.6%) of the fathers were  
186 engaged in the same occupation (farming).

187 **Table 1: Socio-demographic characteristics of adolescent schoolgirls, Nanumba South**  
188 **District, Northern region, Ghana.**

| Variables                                         | Frequency (n=324) | Percentage (%) |
|---------------------------------------------------|-------------------|----------------|
| <b>Age (Years)</b> ( $\bar{x}$ : 16.15, SD: 2.06) |                   |                |
| 10-16                                             | 184               | 56.8           |
| 17-25                                             | 140               | 43.2           |
| <b>Class</b>                                      |                   |                |
| JHS 1                                             | 103               | 31.8           |
| JHS 2                                             | 221               | 68.2           |
| <b>Ethnicity</b>                                  |                   |                |
| Dagomba                                           | 119               | 36.7           |

|                                    |     |      |
|------------------------------------|-----|------|
| Fulano                             | 11  | 3.4  |
| Kokomba                            | 187 | 57.7 |
| Others                             | 7   | 2.2  |
| <b>Religion</b>                    |     |      |
| Christianity                       | 178 | 54.9 |
| Islam                              | 126 | 38.9 |
| Traditional                        | 20  | 6.2  |
| <b>Mother's level of education</b> |     |      |
| No formal education                | 263 | 81.2 |
| Basic/Primary                      | 41  | 12.7 |
| Higher education                   | 20  | 6.1  |
| <b>Father's level of education</b> |     |      |
| No formal education                | 230 | 71.0 |
| Basic/Primary                      | 40  | 12.4 |
| Higher education                   | 54  | 16.6 |
| <b>Mother's Occupation</b>         |     |      |
| Farmer                             | 218 | 67.3 |
| Trader                             | 79  | 24.4 |
| Others                             | 27  | 8.3  |
| <b>Father's Occupation</b>         |     |      |
| Farmer                             | 261 | 80.6 |
| Trader                             | 25  | 7.7  |
| Others                             | 38  | 11.7 |

189

190 **Level of knowledge on iron and folic acid supplementation among adolescent**  
 191 **girls**

192 From Table 2, the majority (59.0%) of the respondents indicated that they have heard about  
 193 anaemia. Among those who have heard about anaemia, most of them heard it from their  
 194 schoolteachers (52.4%), followed by those who heard it from health personnel (41.4%). The most  
 195 common symptoms of anaemia identified in this study were pale skin (40.3%). In addition, the  
 196 most major causes of anaemia among adolescent girls were identified to be iron deficiency, heavy  
 197 menstrual bleeding, and infection (29.3%, 21.5%, and 13.1% respectively). Even though almost  
 198 one-quarters (24.1%) of the respondents knew that anaemia decreases work capacity, and impact  
 199 on school performance (23.6%) and delay mental and physical development (20.4%), some (31.9%)  
 200 did not know any effect (s) of anaemia on adolescent girls. Moreover, more than one-quarter

201 (28.3%) of the respondents knew that anaemia can be prevented by eating iron-rich foods.  
 202 However, less than two-third (56.2%) of the respondents could not identify any iron-rich foods.  
 203 Moreover, a little below two-third (68.5%) of the respondents did not also know the food that aid  
 204 iron absorption, while less than three-quarter (70.4%) of them couldn't also identify any beverage  
 205 which decrease iron absorption. Finally, a greater proportion (96.3%) of the respondents indicated  
 206 that they have heard about IFA supplementation.

207 **Table 2: Knowledge of adolescent girls on anaemia and the IFAS program, Nanumba South**  
 208 **District, Northern region, Ghana.**

| <b>Variables</b>                                | <b>Frequency (n=324)</b> | <b>Percentage (%)</b> |
|-------------------------------------------------|--------------------------|-----------------------|
| <b>Heard anaemia</b>                            |                          |                       |
| No                                              | 133                      | 41.0                  |
| Yes                                             | 191                      | 59.0                  |
| <b>Source of information**</b>                  |                          |                       |
| Health personnel                                | 79                       | 41.4                  |
| Family members                                  | 3                        | 1.6                   |
| Friends/neighbors                               | 5                        | 2.5                   |
| Media                                           | 4                        | 2.1                   |
| School teacher                                  | 100                      | 52.4                  |
| <b>Symptoms of anaemia**</b>                    |                          |                       |
| More likely to become sick                      | 42                       | 22.0                  |
| Pale skin (pallor)                              | 77                       | 40.3                  |
| Weakness                                        | 43                       | 22.5                  |
| Don't know                                      | 29                       | 15.2                  |
| <b>Causes of anaemia**</b>                      |                          |                       |
| Iron deficiency                                 | 56                       | 29.3                  |
| Folic acid deficiency                           | 19                       | 9.9                   |
| Infection                                       | 25                       | 13.1                  |
| Heavy menstrual bleeding                        | 41                       | 21.5                  |
| Don't know                                      | 50                       | 26.2                  |
| <b>Effects of anaemia on adolescent girls**</b> |                          |                       |
| Decreased work capacity                         | 46                       | 24.1                  |
| Delay of mental and physical development        | 39                       | 20.4                  |
| Impact on learning (school performance)         | 45                       | 23.6                  |
| Don't know                                      | 61                       | 31.9                  |
| <b>Prevention of anaemia**</b>                  |                          |                       |
| Eat iron-rich foods                             | 54                       | 28.3                  |

|                                                 |     |      |
|-------------------------------------------------|-----|------|
| Eat vitamin C-rich food during/after meals      | 34  | 17.8 |
| Supplementation                                 | 27  | 14.1 |
| Treat other causes of anaemia                   | 12  | 6.3  |
| Hygiene                                         | 19  | 9.9  |
| Don't know                                      | 45  | 23.6 |
| <b>Iron-rich foods</b>                          |     |      |
| Fish and seafood                                | 58  | 17.9 |
| Flesh meat                                      | 38  | 11.7 |
| Organ meat                                      | 26  | 8.0  |
| Organ meat Fish and seafood                     | 20  | 6.2  |
| Don't know                                      | 182 | 56.2 |
| <b>Food helps iron absorption</b>               |     |      |
| Vitamin C-rich foods                            | 102 | 31.5 |
| Don't know                                      | 222 | 68.5 |
| <b>Beverage which decreases iron absorption</b> |     |      |
| Coffee                                          | 59  | 18.2 |
| Tea                                             | 37  | 11.4 |
| Don't know                                      | 228 | 70.4 |
| <b>Heard about IFA supplementation</b>          |     |      |
| No                                              | 12  | 3.7  |
| Yes                                             | 312 | 96.3 |

209           \*\* means the denominator used for these variables was less than the total sample used in  
210 the study.

211           In Fig 1, majority (32.8%) of the adolescent girls cited regulation of menstruation as the  
212 major benefit they have gotten from taking the IFA tablet. It was further found that about 20.6%  
213 thinks IFA tablets have the following benefits: regulate menstruation, improve their concentration  
214 and performance in class, increase appetite, feel stronger, reduce dizziness, and reduced fatigue  
215 among them, while 19.5% did not perceived any benefit (s) they have gotten from taking the IFA  
216 tablet.

217

### 218           **Fig 1: Benefits of consuming IFA tablets**

219           The overall level of knowledge of respondents on IFA supplementation and its benefits  
220 was generally found to be good (88.0%) (Fig 2).

221

222 **Fig 2: Level of Knowledge of in-schoolgirls about IFAS**

223 **Attitudes and Beliefs towards IFA tablets intake among adolescent girls and**  
224 **teachers**

225 From Fig 3, most (85.2%) of the respondents said there were no side effects associated  
226 with the consumption of IFA tablet. However, some 4.6%, 3.7%, and 3.4% stated respectively that  
227 stomachache, black stool, and nausea were some of the side effects they experienced with the  
228 consumption of IFA tablet, while few (2.47%) cited headache.

229

230 **Fig 3: Perceived side effects of IFA supplement**

231 The results in Table 3 showed that a little above half (52.4%) of the respondents (teachers)  
232 always counsel their students on the IFA consumption, and many of them made the students  
233 consume their tablet in front of the teachers (90.5%). All the teachers have confirmed that the  
234 supply of IFA tablets to them was regular (100.0%). There was proper record keeping on the IFA  
235 supplements given to the students among majority of the teachers (85.7%) while many of the  
236 teachers were oriented on the IFA program (85.7%). In addition, most of the teachers noted that  
237 students did resist the consumption of IFA tablets (90.5%). Moreso, many of the respondents  
238 however indicated that the IFA program served as an additional work burden on them (90.5%).  
239 Finally, the majority (90.5%) of the teachers also said they gave the IFA tablets to students who  
240 were present on the day (s) the IFA tablets were given on the following day when they are present.

241 **Table 3: Views of teachers on Attitude of and challenges towards the use of IFA**  
242 **supplementation, Nanumba South District, Northern region, Ghana.**

| Variables                     | Frequency (n=21) | Percentage (%) |
|-------------------------------|------------------|----------------|
| Counselled on IFA consumption |                  |                |

|                                                         |    |       |
|---------------------------------------------------------|----|-------|
| Yes always                                              | 11 | 52.4  |
| Yes sometimes                                           | 10 | 47.6  |
| <b>Students consumed the tablet in front of teacher</b> |    |       |
| No                                                      | 2  | 9.5   |
| Yes                                                     | 19 | 90.5  |
| <b>Regular supply of tablets</b>                        |    |       |
| Yes                                                     | 21 | 100.0 |
| No                                                      | 0  | 0.0   |
| <b>Maintained records on IFA</b>                        |    |       |
| No                                                      | 3  | 14.3  |
| Yes                                                     | 18 | 85.7  |
| <b>Orientated on IFA program</b>                        |    |       |
| No                                                      | 3  | 14.3  |
| Yes                                                     | 18 | 85.7  |
| <b>Students resisted in taking IFA tablets</b>          |    |       |
| No                                                      | 2  | 9.5   |
| Yes                                                     | 19 | 90.5  |
| <b>IFAS program puts extra burden on your workload</b>  |    |       |
| Yes always                                              | 19 | 90.5  |
| Yes sometimes                                           | 2  | 9.5   |
| <b>Students given IFA when they absent from school</b>  |    |       |
| Yes                                                     | 19 | 90.5  |
| No                                                      | 2  | 9.5   |

243 **Regular supportive supervision and monitoring on IFA supplementation to**  
 244 **schools**

245 From Table 4, all the respondents (health workers) indicated that they supervised IFA  
 246 intake on weekly basis, 14 (100.0%). Most, 11 (78.6%) also said they did carried activities such  
 247 as distribution, health education and promotion of IFA activities. Many of the respondents also  
 248 said they regularly involved other departments, 9 (64.3%) in IFA activities. The reporting format  
 249 of IFA activities were up to date among many of the health workers interviewed in this study, 11  
 250 (78.6%) while many of the respondents indicated they used IFA activities data in making decisions,  
 251 12 (85.7%).

252 **Table 4: How regular health staff embark on IFA supplementation activities, Nanumba**  
 253 **South District, Northern region, Ghana.**

| <b>Variables</b>                       | <b>Frequency (n=14)</b> | <b>Percentage (%)</b> |
|----------------------------------------|-------------------------|-----------------------|
| <b>Supervised weekly intake of IFA</b> |                         |                       |
| Yes                                    | 14                      | 100.0                 |

**How IFAS activities were carried out**

|                                              |    |      |
|----------------------------------------------|----|------|
| Distribution, health education and promotion | 11 | 78.6 |
| Monitoring and supervision                   | 3  | 21.4 |

**Various departments involved in IFAS program**

|     |   |      |
|-----|---|------|
| No  | 5 | 35.7 |
| Yes | 9 | 64.3 |

**Reporting formats up to date**

|     |    |      |
|-----|----|------|
| No  | 11 | 78.6 |
| Yes | 3  | 21.4 |

**IFAS activities used for informed decision-making**

|     |    |      |
|-----|----|------|
| No  | 2  | 14.3 |
| Yes | 12 | 85.7 |

---

254

255 **Acceptability (Compliance) of iron and folic acid supplements among**  
 256 **adolescent girls**

257         The results in Table 5 showed that overall, a greater proportion of the respondents complied  
 258 with the IFAS consumption (65.7%), with most of the students taking the tablets under supervision  
 259 (87.0%). The majority (95.4%) of the adolescent girls also took the IFA tablet on the first day it  
 260 was given by their teachers. Furthermore, 86.1% of the adolescent girls noted that the last time  
 261 they consumed the IFA tablet in school was 1-3 weeks ago before this survey. For adolescent girls  
 262 who consumed the IFA tablets, the most common reasons why they took the tablets were because  
 263 they: wanted to prevent anaemia (49.7%); received advice from their teachers, 108 (34.8%); and  
 264 saw friends taking it (10.3%) respectively. Among those who did not take the IFA tablet in school  
 265 (46.7%) cited the fact that they felt healthy. Most (55.6%) of the adolescent girls have never missed  
 266 taking the IFA tablet in school. However, some 44.4% of the adolescent girls have missed taking  
 267 the IFA tablet because they were absent from school (79.2%) or because they felt the tablet had a  
 268 bad taste (9.7%).

269 **Table 5: Compliance with IFAS among adolescent girls, Nanumba South District, Northern**  
 270 **region, Ghana.**



| Variables                                                           | Frequency (n=324) | Percentage (%) |
|---------------------------------------------------------------------|-------------------|----------------|
| <b>Number of tablets taken in the past 7 weeks before the study</b> |                   |                |
| <5 (Received some)                                                  | 111               | 34.3           |
| ≥5                                                                  | 213               | 65.7           |
| <b>Always take the tablet under supervision</b>                     |                   |                |
| No                                                                  | 42                | 13.0           |
| Yes                                                                 | 282               | 87.0           |
| <b>Took IFA tablet on the first day</b>                             |                   |                |
| No                                                                  | 15                | 4.6            |
| Yes                                                                 | 309               | 95.4           |
| <b>Last time taken IFA tablet</b>                                   |                   |                |
| 1-3 Weeks                                                           | 266               | 86.1           |
| 1 Month                                                             | 43                | 13.9           |
| <b>Reasons for taking IFA tablet</b>                                |                   |                |
| Advice from teacher                                                 | 108               | 34.8           |
| It is free                                                          | 16                | 5.2            |
| Friends are taking it                                               | 32                | 10.3           |
| It prevents anaemia                                                 | 153               | 49.7           |
| <b>Reasons for not taking the tablet</b>                            |                   |                |
| Fear of side effects                                                | 5                 | 33.3           |
| My parents ask me not to take the tablet                            | 3                 | 20.0           |
| I feels healthy                                                     | 7                 | 46.7           |
| <b>Ever missed tablet in School</b>                                 |                   |                |
| No                                                                  | 180               | 55.6           |
| Yes                                                                 | 144               | 44.4           |
| <b>Reasons for missing</b>                                          |                   |                |
| Bad taste of tablet                                                 | 14                | 9.7            |
| Side effects                                                        | 11                | 7.6            |
| Was absent                                                          | 114               | 79.2           |
| Was not given IFA tablet                                            | 5                 | 3.5            |

271 From Table 6, adolescent girls whose fathers were farmers (85.5%), were of the majority  
 272 group who complied with the IFA intake. The Pearson’s chi-square test established that father’s  
 273 occupational level (p=0.002) was the only variable which was significantly associated with  
 274 adolescent girls’ IFA compliance.

275 **Table 6: Factors associated with level of compliance of IFAS among adolescent girls,**  
 276 **Nanumba South District, Northern region, Ghana.**

| Variables   | Compliance with IFAS |            | Total (N=324) | p-value |
|-------------|----------------------|------------|---------------|---------|
|             | Noncompliance        | Compliance |               |         |
| Age (Years) |                      |            |               |         |

|                                    |            |            |            |              |
|------------------------------------|------------|------------|------------|--------------|
| 10-16                              | 58 (52.2)  | 126 (59.1) | 184 (56.8) | 0.234        |
| 17-25                              | 53 (47.8)  | 87 (40.9)  | 140 (43.2) |              |
| <b>Class</b>                       |            |            |            |              |
| JHS 1                              | 38 (34.2)  | 65 (30.5)  | 103 (31.8) | 0.495        |
| JHS 2                              | 73 (65.8)  | 148 (69.5) | 221 (68.2) |              |
| <b>Ethnicity</b>                   |            |            |            |              |
| Dagomba                            | 37 (33.3)  | 82 (38.5)  | 119 (36.7) | 0.283        |
| Kokomba                            | 70 (63.1)  | 117 (54.9) | 187 (57.7) |              |
| Others                             | 4 (3.6)    | 14 (6.6)   | 18 (5.6)   |              |
| <b>Religion</b>                    |            |            |            |              |
| Christians                         | 59 (53.2)  | 119 (55.9) | 178 (54.9) | 0.813        |
| Islam                              | 44 (39.6)  | 82 (38.5)  | 126 (38.9) |              |
| Traditional                        | 8 (7.2)    | 12 (5.6)   | 20 (6.2)   |              |
| <b>Mother's educational level</b>  |            |            |            |              |
| No formal education                | 89 (80.2)  | 174 (81.7) | 263 (81.2) | 0.855        |
| Basic/Primary                      | 14 (12.6)  | 27 (12.7)  | 41 (12.7)  |              |
| Others                             | 8 (7.2)    | 12 (5.6)   | 18 (6.1)   |              |
| <b>Father's educational level</b>  |            |            |            |              |
| No formal education                | 79 (71.2)  | 151 (70.9) | 230 (71.0) | 0.331        |
| Basic/Primary                      | 17 (15.3)  | 23 (10.8)  | 40 (12.4)  |              |
| Others                             | 15 (13.5)  | 39 (18.3)  | 54 (16.6)  |              |
| <b>Mother's occupational level</b> |            |            |            |              |
| Farmer                             | 69 (62.2)  | 149 (70.0) | 218 (67.3) | 0.347        |
| Trader                             | 32 (28.8)  | 47 (22.1)  | 79 (24.4)  |              |
| Others                             | 10 (9.0)   | 17 (8.0)   | 27 (8.3)   |              |
| <b>Father's occupational level</b> |            |            |            |              |
| Farmer                             | 79 (71.2)  | 182 (85.5) | 261 (80.6) | <b>0.002</b> |
| Trader                             | 16 (14.4)  | 9 (4.2)    | 25 (7.7)   |              |
| Others                             | 16 (14.4)  | 22 (10.3)  | 38 (11.7)  |              |
| <b>Awareness of anaemia</b>        |            |            |            |              |
| Yes                                | 58 (52.3)  | 133 (62.4) | 191 (58.9) | 0.077        |
| No                                 | 53 (47.8)  | 80 (37.6)  | 133 (41.1) |              |
| <b>Knowledge on anaemia</b>        |            |            |            |              |
| Good                               | 55 (94.8)  | 114 (85.1) | 169 (88.0) | 0.056        |
| Poor                               | 3 (5.2)    | 20 (14.9)  | 23 (12.0)  |              |
| <b>Knowledge on IFAS program</b>   |            |            |            |              |
| Good                               | 107 (96.4) | 208 (97.7) | 315 (97.2) | 0.514        |
| Poor                               | 4 (3.6)    | 5 (2.4)    | 9 (2.8)    |              |

277 From Table 7, the odd of compliance with IFAS among respondents who among adolescent  
 278 girls 17-25 years was 56% times lower compared to those who were 10-16 years (AOR = 0.44 (95%

279 CI: 0.21-0.96) p = 0.038). Also, Kokomba girls were 83% less likely to comply to IFA  
 280 consumption as compared to Dagomba adolescent girls (AOR = 0.17 (95% CI: 0.03-0.89) p =  
 281 0.036).

282

283 **Table 7: Predictors of level of compliance of IFAS among adolescent girls, Nanumba South**  
 284 **District, Northern region, Ghana.**

| <b>Variables</b>                   | <b>Frequency (N=324)</b> | <b>Unadjusted Odd Ratio<br/>OR(95%CI)P-value</b> | <b>Adjusted Odd Ratio<br/>OR(95%CI)P-value</b> |
|------------------------------------|--------------------------|--------------------------------------------------|------------------------------------------------|
| <b>Age (Years)</b>                 |                          |                                                  |                                                |
| 10-16 yrs                          | 184 (56.8)               | Reference                                        | Reference                                      |
| 17-25 yrs                          | 140 (43.2)               | 0.76(0.48-1.20)0.234                             | 0.44(0.21-0.96) <b>0.038</b>                   |
| <b>Class</b>                       |                          |                                                  |                                                |
| JHS 1                              | 103 (31.8)               | Reference                                        | Reference                                      |
| JHS 2                              | 221 (68.2)               | 1.19(0.73-1.93)0.495                             | 1.41(0.60-3.32)0.429                           |
| <b>Ethnicity</b>                   |                          |                                                  |                                                |
| Dagomba                            | 119 (36.7)               | Reference                                        | Reference                                      |
| Kokomba                            | 187 (57.7)               | 0.75(0.46-1.23)0.257                             | 0.17(0.03-0.89) <b>0.036</b>                   |
| Others                             | 18 (5.6)                 | 1.58(0.49-5.12)0.447                             | 3.94(0.39-39.40)0.243                          |
| <b>Religion</b>                    |                          |                                                  |                                                |
| Christians                         | 178 (54.9)               | 1.34(0.52-3.47)0.540                             | 0.89(0.21-3.88)0.879                           |
| Islam                              | 126 (38.9)               | 1.24(0.47-3.27)0.660                             | 0.29(0.04-2.44)0.257                           |
| Traditional                        | 20 (6.2)                 | Reference                                        | Reference                                      |
| <b>Mother's educational level</b>  |                          |                                                  |                                                |
| No formal education                | 263 (81.2)               | Reference                                        | Reference                                      |
| Basic/Primary                      | 41 (12.7)                | 0.99(0.49-1.97)0.969                             | 0.39(0.10-1.58)0.189                           |
| Others                             | 18 (6.1)                 | 0.77(0.30-1.95)0.577                             | 0.12(0.01-1.16)0.067                           |
| <b>Father's educational level</b>  |                          |                                                  |                                                |
| No formal education                | 230 (71.0)               | Reference                                        | Reference                                      |
| Basic/Primary                      | 40 (12.4)                | 0.71(0.36-1.40)0.322                             | 1.24(0.28-5.43)0.772                           |
| Others                             | 54 (16.6)                | 1.36(0.71-2.62)0.357                             | 3.37(0.70-16.24)0.129                          |
| <b>Mother's occupational level</b> |                          |                                                  |                                                |
| Farmer                             | 218 (67.3)               | 1.27(0.55-2.92)0.573                             | 0.97(0.16-5.87)0.972                           |
| Trader                             | 79 (24.4)                | 0.86(0.35-2.13)0.750                             | 0.33(0.05-1.98)0.223                           |
| Others                             | 27 (8.3)                 | Reference                                        | Reference                                      |
| <b>Father's occupational level</b> |                          |                                                  |                                                |
| Farmer                             | 261 (80.6)               | 1.68(0.84-3.36)0.146                             | 1.98(0.38-10.26)0.415                          |
| Trader                             | 25 (7.7)                 | 0.41(0.144-1.16)0.092                            | 0.41(0.06-2.71)0.359                           |
| Others                             | 38 (11.7)                | Reference                                        | Reference                                      |
| <b>Knowledge on anaemia</b>        |                          |                                                  |                                                |

|                                  |            |                      |                       |
|----------------------------------|------------|----------------------|-----------------------|
| Good                             | 169 (88.0) | 0.31(0.09-1.09)0.068 | 0.37(0.09-1.43)0.148  |
| Poor                             | 23 (12.0)  | Reference            | Reference             |
| <b>Knowledge on IFAS program</b> |            |                      |                       |
| Good                             | 315 (97.2) | 1.56(0.41-5.91)0.517 | 3.05(0.19-50.17)0.434 |
| Poor                             | 9 (2.8)    | Reference            | Reference             |

---

285

## 286 **Discussion**

### 287 **Level of knowledge on the benefits of iron and folic acid supplementation** 288 **among adolescent girls**

289 In this present study, it was found that the level of knowledge of respondents on IFA  
290 supplementation and its benefits was generally good (88.0%). This finding contradicted with what  
291 was reported in another study in Tamale, Ghana, that about 64.9% of adolescent girls had poor  
292 level of knowledge IFA supplementation [16]. However, among different population of pregnant  
293 women in Northwest Ethiopia, a lower figure of about 57.5% was reported to have good level of  
294 knowledge about anaemia [29].

295 We also found that less than two-fifths (32.9%) of the adolescent girls noted that the major  
296 benefit they have gotten from taking the IFA tablet was regulation of menstruation only. It was  
297 further found that 20.55% of the girls knew that regulation of menstruation, improving  
298 concentration and performance in class, increasing appetite, feeling stronger, reducing dizziness,  
299 and reducing fatigue were all benefits of taking the IFA tablets. Similarly to these findings, it was  
300 revealed in the United States that reduced fatigue, increased appetite, and improved concentration  
301 were respectively the major cited benefits of IFA tablets [30]. However, some 19.5% did not know  
302 any benefit (s) they have gotten from taking the IFA tablet.

303 **Attitudes and Beliefs towards IFA tablets intake among adolescent girls and**  
304 **teachers**

305 In this study, most (85.2%) of the respondent girls indicated that the consumption of IFA  
306 tablet had no associated side effects. This differed from the report from a cross-sectional study in  
307 Ethiopia which found that one of the main reasons for non-adherence to iron folate  
308 supplementation was fear of side effect [29]. However, some respondents in this current study  
309 mentioned stomachache, black stool, nausea, and headache as some of the perceived side effects  
310 they experienced with the consumption of the IFA tablet. Consequently, these side effects could  
311 threaten the success of the IFAS program. A similar finding was reported in India and US that the  
312 major negative factors for the program were fear of adverse effects such as nausea and vomiting,  
313 attribution of abdominal pain due to other causes of IFA tablets [27,30]. This present study's  
314 finding also aligned in parts with what was reported in Iran, that an upset feeling, vomiting,  
315 abdominal discomfort, unpleasant taste of the pills, and feeling of drowsiness/dizziness due to the  
316 poor quality of IFA tablets were the other main reasons for refusing the pills [31].

317 Moreover, in this present study, a little above half (52.4%) of the respondent teachers did  
318 counsel their students to take the IFA tablet. It was also found that a vast majority (90.5%) of the  
319 teachers made their students consumed the IFA tablets in front of them. This is encouraging as less  
320 teachers did not follow the IFAS program recommendation that teachers should directly supervise  
321 the adolescent girls to swallow the IFA tablet [32]. In schools, supervising students to ingest the  
322 IFA tablet is considered one of the most important aspects of the IFAS program [33]. Without  
323 supervision, the possibility of school children throwing the tablet away is reportedly likely to be  
324 very high [34]. The supply of IFA tablets to the schools was reported to be regular as found among

325 all the respondent teachers. This study also found that proper adherence to IFA records keeping  
326 was observed among majority of the teachers (85.7%), while many of the teachers were oriented  
327 on the IFA program (85.7%). This finding is important because it is most likely to give an  
328 opportunity to build the teachers' capacity to educate students to consume IFAS.

329         It was further revealed in this study that most of the adolescent girls initially resisted the  
330 consumption of IFA tablets (90.5%). This is contrary to what was reported in a previous study that  
331 there was no resistance in taking tablets from students [24]. Moreover, many of the respondent  
332 teachers complained that the IFA program was an additional work burden on them (90.5%). This  
333 finding agreed with what was reported in India that IFAS program was an extra workload on  
334 teachers [27]. To ensure that the student girls did not miss the tablets, the majority (90.5%) of the  
335 teachers gave the IFA tablets to those who absent themselves from school on the day (s) the IFA  
336 tablets were given, when they come to school the next day.

### 337 **Supportive supervision and monitoring on IFA supplementation to schools**

338         In this current study, it was revealed that all the respondents (health workers) supervised  
339 IFA intake on weekly basis. Most of the respondents carried out activities such as distribution,  
340 health education and promotion of IFA in the various schools. Many of the teachers were found to  
341 always regularly involved other departments in IFA activities. This current study finding did not  
342 support what was reported in India that lack of coordination and ownership among the various  
343 departments were noticed [35]. The reporting format of IFA activities were also found to be up to  
344 date among many of the health workers interviewed in this study. This contradicted with the  
345 finding in a previous study that some of the reporting formats were outdated and missed section  
346 for IFA syrup [35]. It was further revealed that IFA activities data obtained from the various

347 schools in this study were usually used in making informed decisions towards the successful  
348 implementation of the IFA program as opposed to what was previously reported that focus had  
349 been on the collection of data, but its utilization for informed decision-making and policy decisions  
350 was lacking [35].

## 351 **Compliance with iron and folic acid supplements with IFAS among adolescent** 352 **girls**

353 In this study, almost two-third (65.7%) of the respondents complied with the IFAS intake,  
354 which was quite recommendable. However, this compliance was lower as compared to similar a  
355 study which showed 81.7% among adolescent girls in Karaga District, Ghana [36]. This finding  
356 also differed from what was reported among high school girls that adherence to IFAS was only  
357 37.2% [34]. High compliance in this study, which is expected to help improve iron status among  
358 the student girls could be a result of stock availability of the IFA tablet as noted in the schools.

359 Furthermore, the majority (95.4%) of the adolescent girls took the IFA tablet on the first  
360 day it was given by their teachers. Many (86.1%) of the girls however noted that the last time they  
361 have consumed the IFA tablet in school was 1-3 weeks ago before this study. The most common  
362 motivating factors for consuming the IFA tablet by the girls were because they wanted to prevent  
363 anaemia and that they were being advised by their teachers respectively. The adolescent girls who  
364 did not take the IFA in school said it was because they perceived they were healthy (46.7%). This  
365 present finding confirmed what was previously reported in India that one of the main reasons that  
366 led to their respondents not consuming iron and folic acid were the feeling that they were healthy  
367 [24].

368 Even though more than half (55.6%) of the girls never missed taking the IFA tablet in  
369 school, it was found that a significant proportion of 44.4% of them missed taking the IFA tablet  
370 because they were absent from school, or they felt the tablet had a bad taste. A similar finding was  
371 reported in Indonesia that motivation to take IFA tablet declined when respondents perceived the  
372 odour of tablet was unpleasant and experienced side effects [37].

373 This study also found that father's occupational level was the only variable which had a  
374 statistically significance association with adolescent girls' level of IFA compliance. These findings  
375 did not agree with what was reported by Dubik and colleagues who noted that the level of  
376 education and occupation of mothers of adolescent girls, awareness on anaemia, and good  
377 knowledge of anaemia and of the IFAS program were significantly associated with IFAS  
378 compliance [16]. The odds of compliance with the IFAS among respondents who were 17-25 years  
379 were 56% times lower compared to those who were 10-16 years in this study. This could be  
380 because adolescent girls who were older were curious about their health and tried taking the  
381 necessary measures to prevent themselves from sickness. In addition, it was revealed that  
382 respondents who were Dagomba adolescent girls had a higher likelihood of compliance to IFAS  
383 as compared to Kokomba who were 83% less likely to comply to IFA consumption. This present  
384 study findings did not also corroborate with what was reported in the Karaga District of Northern  
385 Region that apart from socio-economic status of respondents, guardian's level of education and in  
386 or out of school adolescent, all other variables did not have any statistically significant relationship  
387 with the adherence to the required number of Iron and Folic Acid intake per month [36].



## 388 **Conclusion**

389 In conclusion, we found that most of the respondents complied with the IFAS (65.7%).  
390 Also, while most respondents reported no associated side effects with IFA tablet consumption, a  
391 good proportion perceived side effect such as stomachache, black stool, nausea, and headache. The  
392 study further underscored the role of teachers in counseling and monitoring students, with a  
393 significant portion ensuring that students consume IFA tablets in their presence.

394 Interestingly, a considerable number of students initially resisted IFA tablet consumption,  
395 but a majority eventually complied because of a series of encouragement from their teachers. The  
396 demographic variable of father's occupational level emerged as the sole factor significantly  
397 associated with adolescent girls' level of IFA compliance. The odds of compliance were notably  
398 lower among girls aged 17-25 compared to those aged 10-16 years and Kokombas had lower odds  
399 of IFA compliance compared to the Dagombas.

400 Health workers played a crucial role in IFA program implementation, regularly supervising  
401 intake and maintaining up-to-date reporting formats. This study encompassed not only the  
402 students' experiences and compliance with IFAS, but also the pivotal roles of teachers and health  
403 workers in ensuring its success were notified in this study.

## 404 **Recommendations**

- 405 1. Efforts should be made by all stakeholders to involve and encourage local community leaders and  
406 religious leaders in IFAs implementation. This will help to motivate the parents and students to  
407 take IFA regularly and to address the benefits of IFA.

- 408 2. Future research should be conducted to determine the relationship between IFAs intake and level  
409 of anaemia status among adolescent girls.

## 410 **Acknowledgement**

411 We acknowledge the District Director of Education, Nanumba South District, and all  
412 headteachers and class teachers at the schools, for respectfully accepting us to conduct this study  
413 in their schools. Finally, we wish to thank our research participants (students, teachers, and health  
414 workers) for their cooperation and willingness to take part in the study. We finally acknowledge  
415 the good work done by our data collection assistants for helping us administer the questionnaires  
416 successfully.

## 417 **Limitations of the Study**

418 Most of the results in this study were self-reported by adolescent girls. There was a possible  
419 tendency to recall bias and exaggeration, hence, the result was interpreted with caution. The study  
420 did not also measure Hb levels of the adolescent girls to determine the impact of the IFAS on their  
421 Hb levels. Finally, this study could not include the schoolteachers and local health workers’  
422 knowledge and attitude towards this program and suggestions for improvement.

## 423 **REFERENCES**

- 424 [1] A. S. Le Dain *et al.*, “Levels and trends of adolescent girl’s undernutrition and anemia in West and  
425 Central Africa from 1998 to 2017,” *J Glob Health*, vol. 11, pp. 1–6, 2021, doi:  
426 10.7189/jogh.11.13006.
- 427 [2] M. W. Merid *et al.*, “An unacceptably high burden of anaemia and it’s predictors among young  
428 women (15–24 years) in low and middle income countries; set back to SDG progress,” *BMC Public*  
429 *Health*, vol. 23, no. 1, Dec. 2023, doi: 10.1186/s12889-023-16187-5.

- 430 [3] A. E. Jacobson-Kelly, R. Sharma, and J. M. Powers, “Iron Deficiency Anemia,” in *Hematology in*  
431 *the Adolescent Female*, Cham: Springer International Publishing, 2020, pp. 185–194. doi:  
432 10.1007/978-3-030-48446-0\_17.
- 433 [4] G. C. Patton *et al.*, “Our future: a Lancet commission on adolescent health and wellbeing,” *The*  
434 *Lancet*, vol. 387, no. 10036, pp. 2423–2478, Jun. 2016, doi: 10.1016/S0140-6736(16)00579-1.
- 435 [5] M. T. Engidaw, M. M. Wassie, and A. S. Teferra, “Anemia and associated factors among adolescent  
436 girls living in Aw-Barre refugee camp, Somali regional state, Southeast Ethiopia,” *PLoS One*, vol.  
437 13, no. 10, Oct. 2018, doi: 10.1371/journal.pone.0205381.
- 438 [6] WHO, “Weekly iron and folic acid supplementation as an anaemia-prevention strategy in women  
439 and adolescent girls: lessons learnt from implementation of programmes among nonpregnant  
440 women of reproductive age.,” Geneva, 2018.
- 441 [7] World Health Organization (WHO), “Weekly iron and folic acid supplementation (WIFAS) for  
442 prevention of anaemia in menstruating women and adolescent girls and reducing the risk of neural  
443 tube defect (NTD) affected pregnancies,” 2022.
- 444 [8] L. Gosdin *et al.*, “Predictors of anaemia among adolescent schoolchildren of Ghana,” *J Nutr Sci*,  
445 vol. 9, p. e43, Sep. 2020, doi: 10.1017/jns.2020.35.
- 446 [9] F. Azupogo, A. R. Abizari, S. J. M. Osendarp, E. J. Feskens, and I. D. Brouwer, “Ten2Twenty-  
447 Ghana: Study Design and Methods for an Innovative Randomized Controlled Trial with Multiple-  
448 Micronutrient–Fortified Biscuits among Adolescent Girls in Northeastern Ghana,” *Curr Dev Nutr*,  
449 vol. 5, no. 2, p. nzaa184, Feb. 2021, doi: 10.1093/CDN/NZAA184.
- 450 [10] E. Alfiah *et al.*, “Coverage and adherence of weekly iron folic acid supplementation among school  
451 going adolescent girls in indonesia,” *J Nutr Sci Vitaminol (Tokyo)*, vol. 66, pp. S118–S121, 2020,  
452 doi: 10.3177/jnsv.66.S118.
- 453 [11] L. Gosdin *et al.*, “A School-Based Weekly Iron and Folic Acid Supplementation Program  
454 Effectively Reduces Anemia in a Prospective Cohort of Ghanaian Adolescent Girls,” *Journal of*  
455 *Nutrition*, vol. 151, no. 6, pp. 1646–1655, Jun. 2021, doi: 10.1093/jn/nxab024.
- 456 [12] D. A. P. Bundy, N. de Silva, S. Horton, D. T. Jamison, and G. C. Patton, “The School as a Platform  
457 for Addressing Health in Middle Childhood and Adolescence,” *Disease Control Priorities, Third*

- 458            *Edition (Volume 8): Child and Adolescent Health and Development*, Nov. 2017, doi: 10.1596/978-  
459            1-4648-0423-6/PT4.CH20.
- 460 [13] R. T. F. Cenedesi *et al.*, “Health education in the school environment: interdisciplinary practices,  
461            constitutional guarantees, and full development of the individual,” *OBSERVATÓRIO DE LA*  
462            *ECONOMÍA LATINOAMERICANA*, vol. 22, no. 2, p. e3217, Feb. 2024, doi: 10.55905/oelv22n2-  
463            086.
- 464 [14] WHO, “Making every school a health-promoting school: Country case studies,” World Health  
465            Organization, Geneva, 2021.
- 466 [15] P. R. Deshmukh, G. B. S., and M. S. Bharambe, “Effectiveness of weekly supplementation of iron  
467            to control anaemia among adolescent girls of Nashik, Maharashtra, India,” *J Health Popul Nutr*, vol.  
468            26, no. 1, pp. 74–78, 2008.
- 469 [16] S. D. Dubik, K. E. Amegah, A. Alhassan, L. N. Mornah, and L. Fiagbe, “Compliance with Weekly  
470            Iron and Folic Acid Supplementation and Its Associated Factors among Adolescent Girls in Tamale  
471            Metropolis of Ghana,” *J Nutr Metab*, vol. 2019, p. 12, 2019, doi: 10.1155/2019/8242896.
- 472 [17] L. Gosdin *et al.*, “A Qualitative Analysis of Program Fidelity and Perspectives of Educators and  
473            Parents after Two Years of the Girls’ Iron-Folate Tablet Supplementation (GIFTS) Program in  
474            Ghanaian Secondary Schools,” *Curr Dev Nutr*, vol. 5, no. 7, p. nzab094, Jul. 2021, doi:  
475            10.1093/cdn/nzab094.
- 476 [18] L. Gosdin *et al.*, “Barriers to and Facilitators of Iron and Folic Acid Supplementation within a  
477            School-Based Integrated Nutrition and Health Promotion Program among Ghanaian Adolescent  
478            Girls,” *Curr Dev Nutr*, vol. 4, no. 9, p. nzaa135, Sep. 2020, doi: 10.1093/cdn/nzaa135.
- 479 [19] N. Nuryani and Y. Paramata, “Associated factors of adolescents malnutrition in junior high school  
480            student,” *Jurnal Gizi dan Dietetik Indonesia (Indonesian Journal of Nutrition and Dietetics)*, vol. 8,  
481            no. 1, p. 9, Aug. 2020, doi: 10.21927/ijnd.2020.8(1).9-21.
- 482 [20] H. P. Makan *et al.*, “The Relationship Between Diet, Lifestyle, and Family Support and the  
483            Incidence of Anemia in Adolescent Girls at Tanwirian Junior High School, Cianjur,” vol. 03, no. 10,  
484            2024, [Online]. Available: <http://dohara.or.id/index.php/isjnm>
- 485 [21] A. Farid Rivai, “Prevention of Anemia with Iron in Adolescent Girls,” 2024. [Online]. Available:  
486            <https://annpublisher.org/ojs/index.php/medisci>

- 487 [22] R. A. Daniel, M. Kalaivani, S. Kant, and S. Gupta, “Prevalence of anaemia among adolescent girls  
488 (10-19 years) in India: A systematic review and meta-analysis,” 2023.
- 489 [23] W. F. Cochran, “Sampling Techniques: Chapter 5,” in *Sampling Techniques*, Third edit., New York:  
490 John Wiley and Sons, 1977, ch. Chapter 5, p. 10.
- 491 [24] A. K. Sarada and S. A. Thilak, “Evaluation of Weekly Iron and Folic Acid Supplementation  
492 Programme for adolescents in rural schools of Kannur, North Kerala, India: A cross-sectional study,”  
493 *Int J Med Sci Public Health*, vol. 5, no. 11, p. 2259, 2016, doi: 10.5455/ijmsph.2016.01042016452.
- 494 [25] A. Gupta, S. K. Mohammed, A. Saxena, S. Rahi, and A. Mohan, “Operational Framework Weekly  
495 Iron and Folic Acid Supplementation Programme for Adolescents,” Delhi, India, 2012.
- 496 [26] R. J. Bhatt, H. K. Mehta, V. Khatri, J. Chhaya, K. Rahul, and P. Patel, “A study of access and  
497 compliance of iron and folic acid tablets for prevention and cure of anaemia among adolescent age  
498 group females in Ahmedabad district of India surveyed under multi indicator cluster survey,” *Global  
499 Journal of Medicine and Public Health*, vol. 2, no. 4, pp. 1–6, 2013.
- 500 [27] P. Dhikale, E. Suguna, A. Thamizharasi, and A. Dongre, “Evaluation of Weekly Iron and Folic Acid  
501 Supplementation program for adolescents in rural Pondicherry, India,” *Int J Med Sci Public Health*,  
502 vol. 4, no. 10, p. 1360, 2015, doi: 10.5455/ijmsph.2015.14042015280.
- 503 [28] A. A. Sadore, L. A. Gebretsadik, and M. A. Hussen, “Compliance with iron-folate supplement and  
504 associated factors among antenatal care attendant mothers in Misha District, South Ethiopia:  
505 Community based cross-sectional study,” *J Environ Public Health*, vol. 2015, pp. 1–7, 2015, doi:  
506 10.1155/2015/781973.
- 507 [29] T. Molla, T. Guadu, E. A. Muhammad, and M. T. Hunegnaw, “Factors associated with adherence  
508 to iron folate supplementation among pregnant women in West Dembia district, northwest Ethiopia:  
509 A cross sectional study,” *BMC Res Notes*, vol. 12, no. 1, pp. 1–6, 2019, doi: 10.1186/s13104-019-  
510 4045-2.
- 511 [30] S. Priya *et al.*, “Factors influencing weekly iron folic acid supplementation programme among  
512 school children: Where to focus our attention?”
- 513 [31] S. Kheirouri and M. Alizadeh, “Process evaluation of a national school-based iron supplementation  
514 program for adolescent girls in Iran,” *BMC Public Health*, vol. 14, no. 1, pp. 1–8, 2014, doi:  
515 10.1186/1471-2458-14-959.

- 516 [32] H. Novita, N. Nurlina, and S. Suratmi, “The Obedience Factors of Teenage Girls to Consume Iron  
517 Tablet at SMK Negeri 1 Kedawung, Cirebon,” *JURNAL KEBIDANAN*, vol. 11, no. 1, pp. 23–33,  
518 Apr. 2021, doi: 10.31983/jkb.v11i1.6368.
- 519 [33] United Nations Children Fund, “Iron & Folic Acid (IFA) Supplementation for Adolescent Girls and  
520 Women Participants Manual for Health Workers,” 2017. Accessed: Nov. 23, 2024. [Online].  
521 Available: <https://www.unicef.org/ghana/media/1331/file>
- 522 [34] Apriningsih, S. Madanijah, C. M. Dwiriani, and R. Kolopaking, “Determinant of highschool girl  
523 adolescent adherence to consume iron folic acid supplementation in Kota Depok,” *J Nutr Sci*  
524 *Vitaminol (Tokyo)*, vol. 66, pp. S369–S375, 2020, doi: 10.3177/jnsv.66.S369.
- 525 [35] V. Bhatia, P. Mahajan, S. P. Parida, S. Bhattacharjee, and S. S. Sahoo, “Challenges in supervision,  
526 monitoring, and reporting in anemia programme implementation in Odisha, India: A qualitative  
527 process documentation,” *J Family Med Prim Care*, vol. 8, no. 1, pp. 1365–1369, 2019, doi:  
528 10.4103/jfmpe.jfmpe.
- 529 [36] A. Yidana, T. B. Azongo, and A. Mohammed, “Iron and Folic Acid Supplementation Compliance  
530 among Adolescent Girls in Karaga District , Ghana,” *Public Health Research*, vol. 10, no. 5, pp.  
531 133–142, 2020, doi: 10.5923/j.phr.20201005.01.
- 532 [37] M. R. Ansari, B. J. Istiti Kandarina, N. Kusmayanti, D. Destriyani, M. Masfufah, and R. Fikrinnisa,  
533 “The acceptability of weekly iron-folic acid supplementation and its influencing factors among  
534 adolescent school girls in Yogyakarta city: a mixmethods study,” *Malays J Nutr*, vol. 27, no. 1, pp.  
535 53–66, 2021, doi: 10.31246/MJN-2020-0019.
- 536

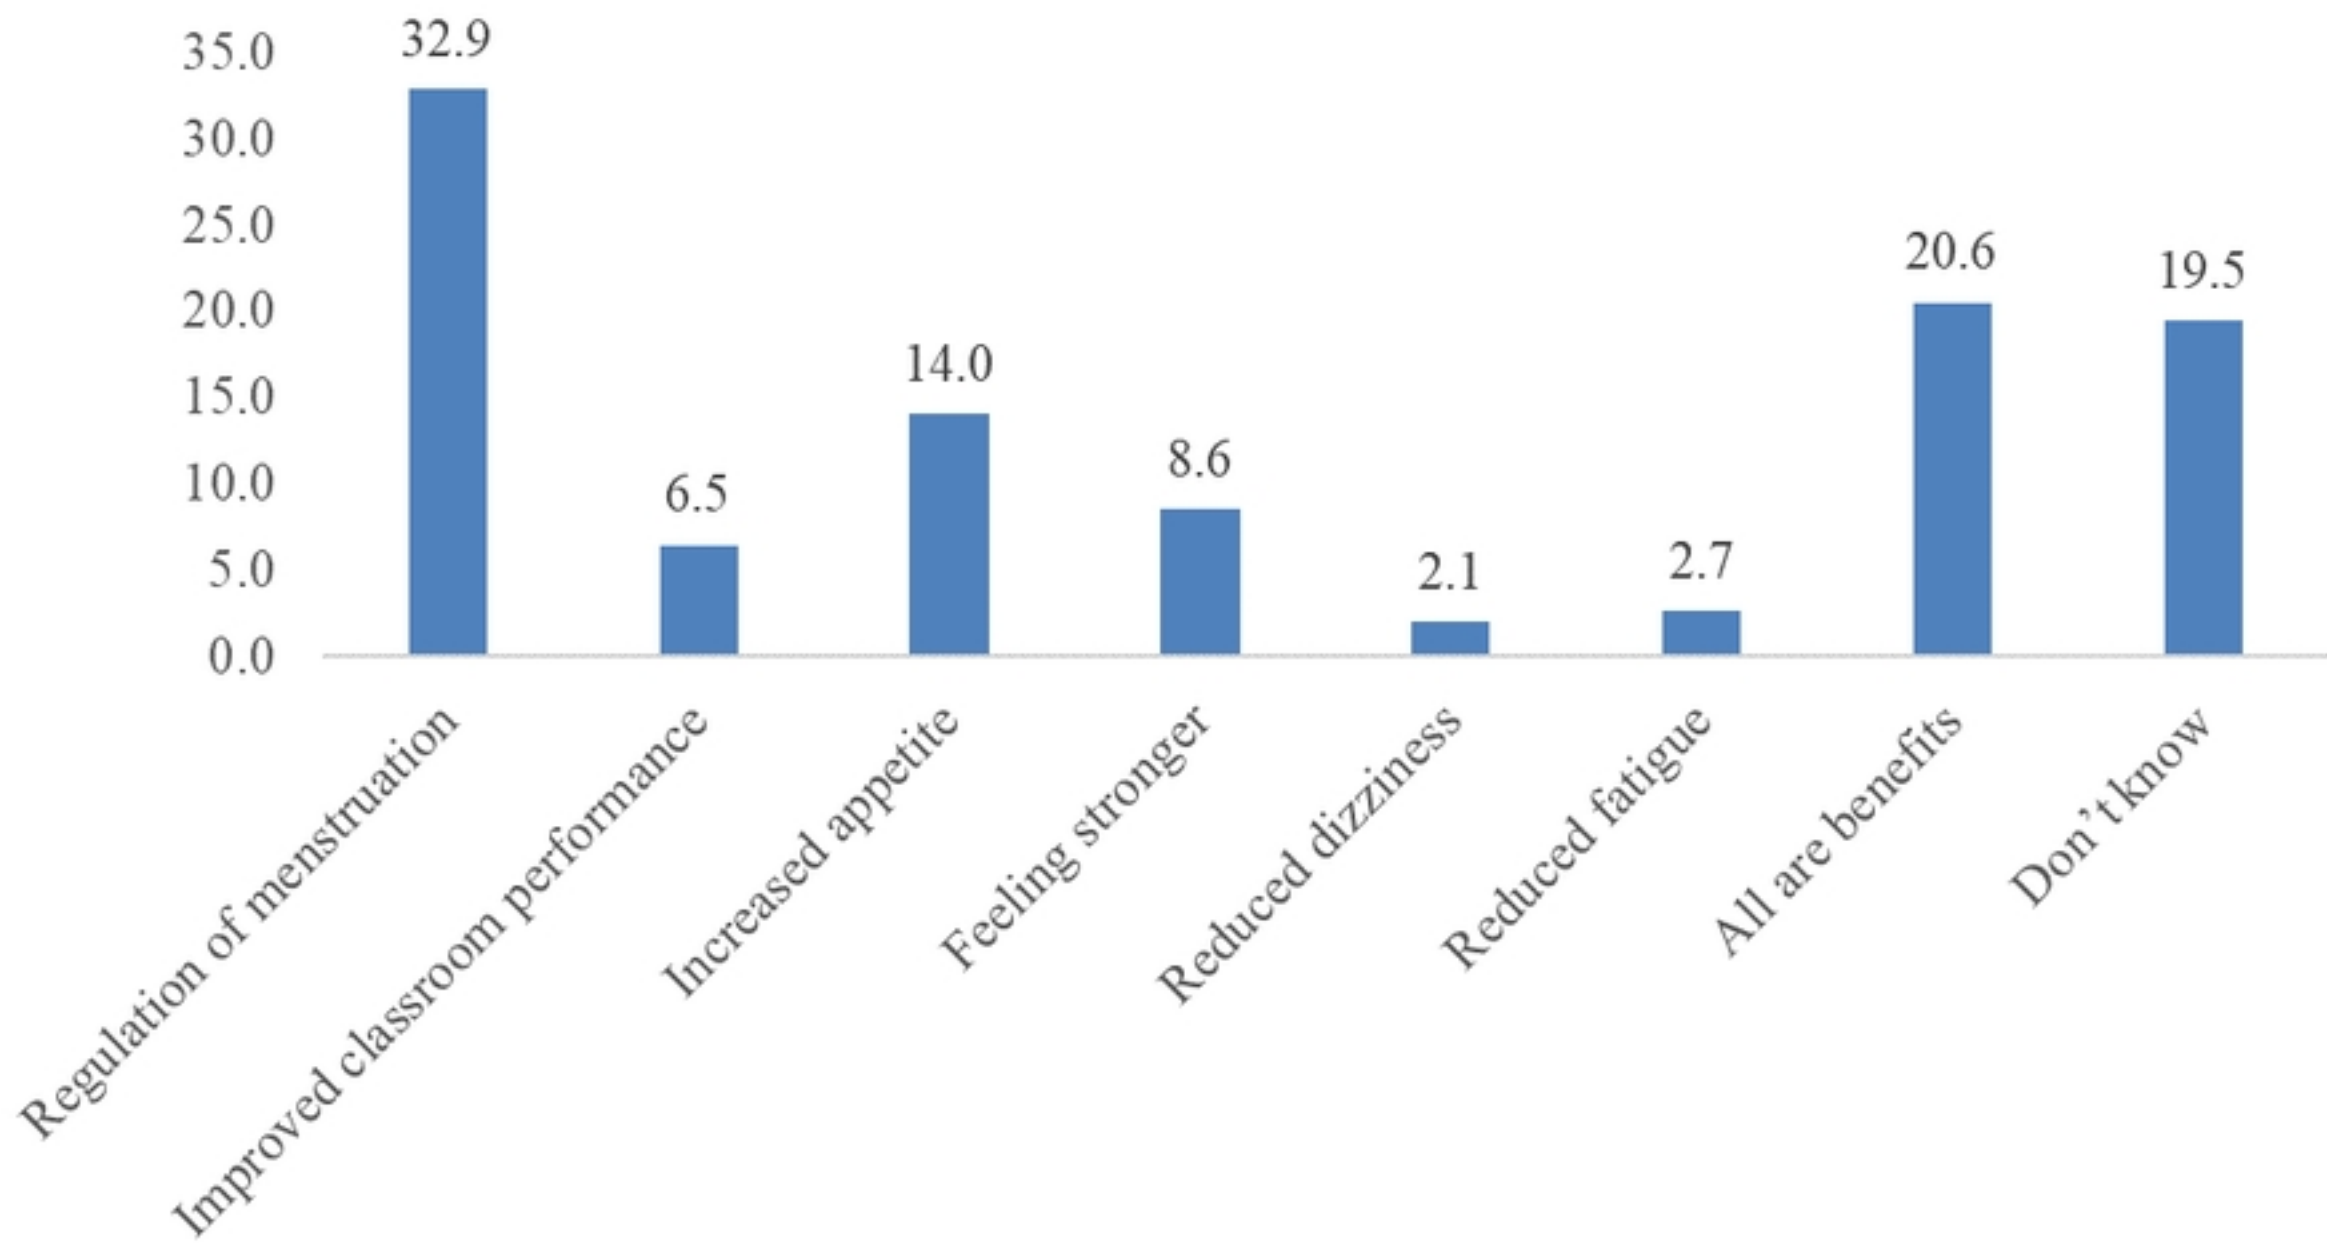

Figure

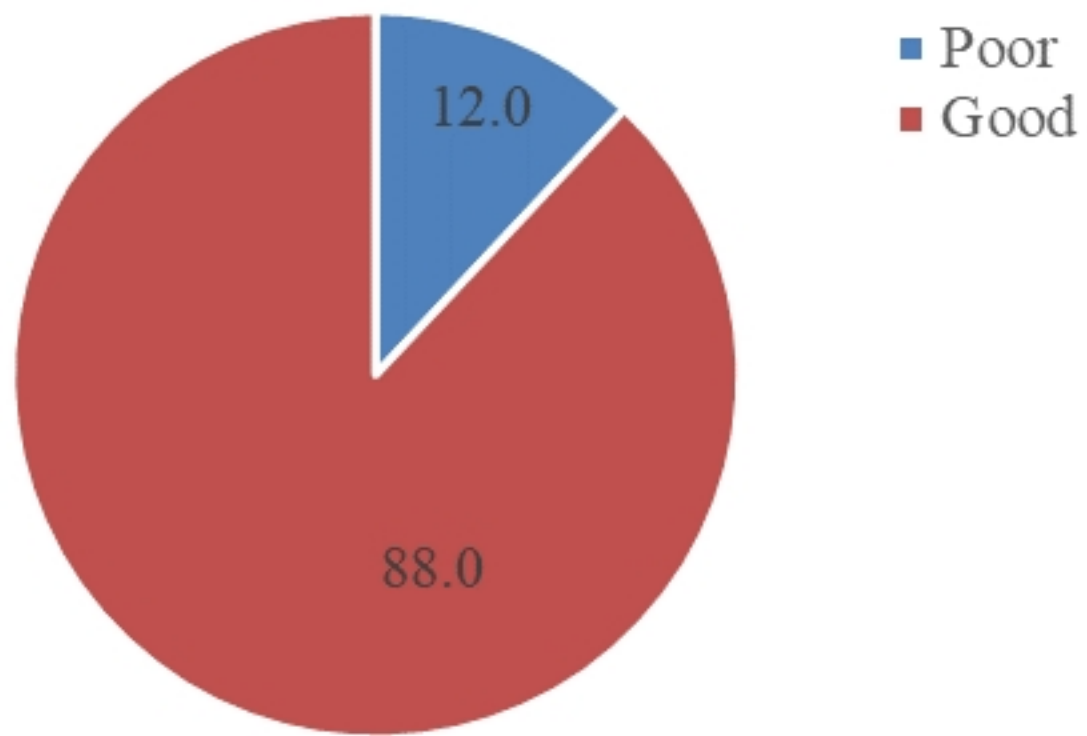

Figure



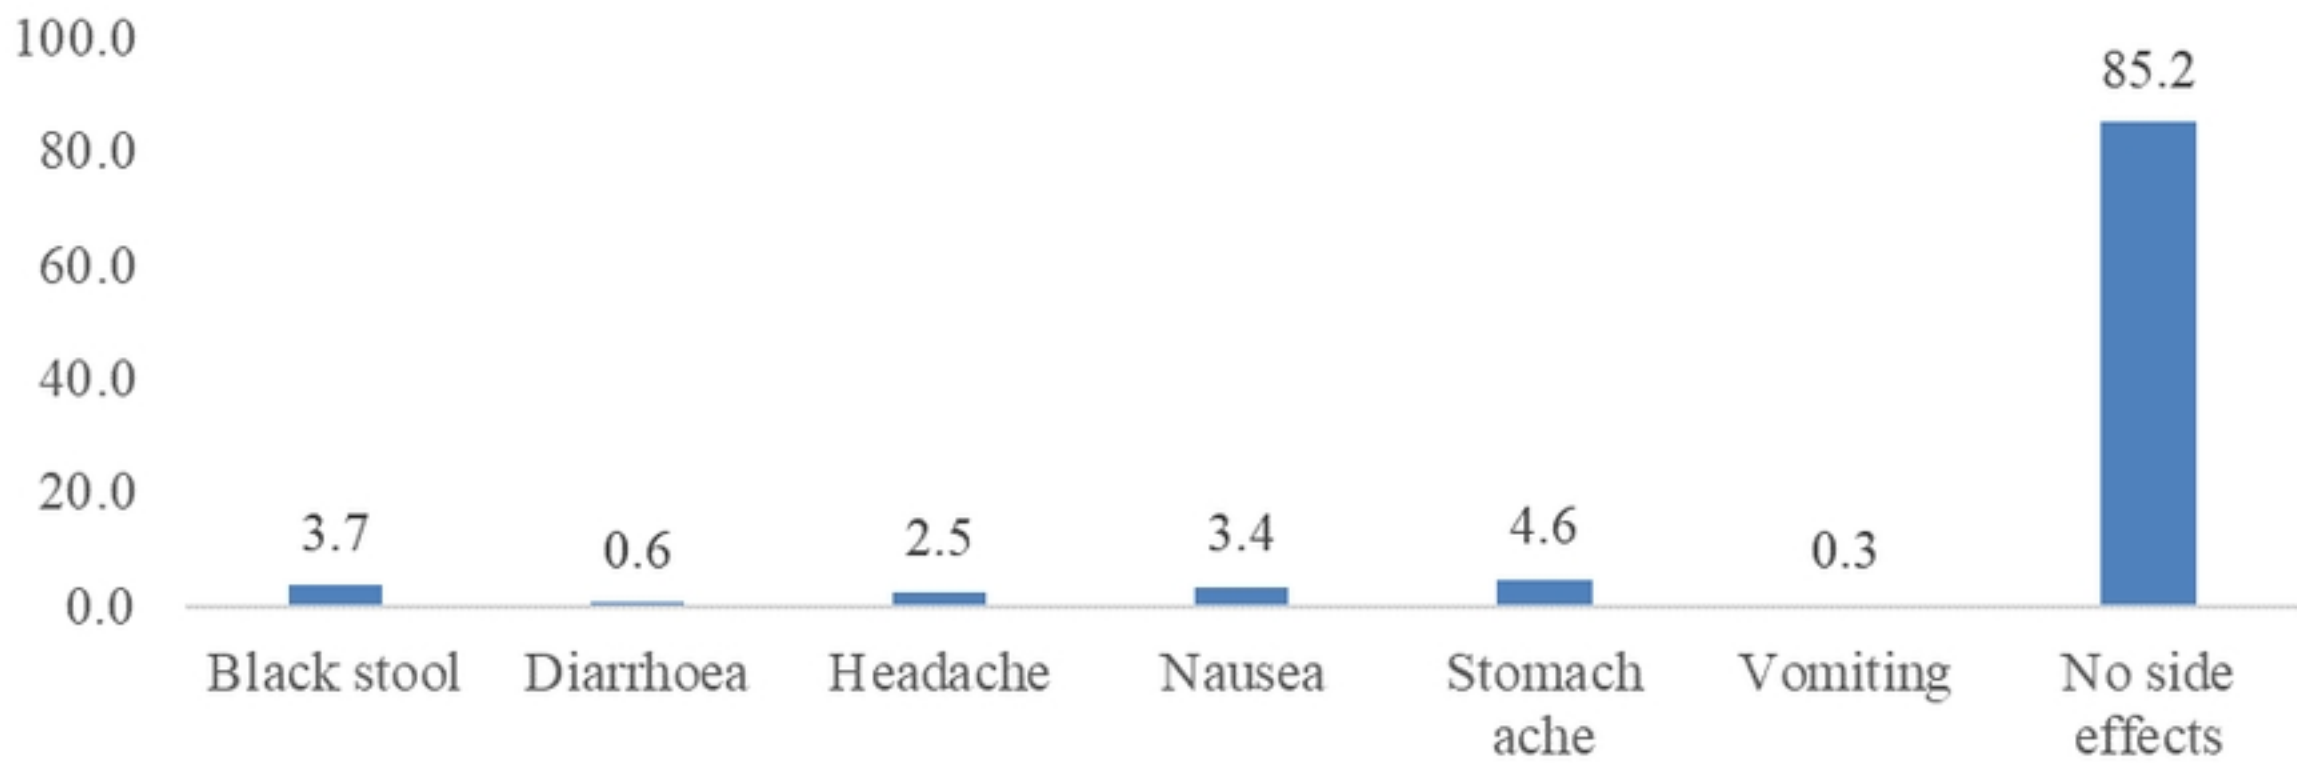

Figure
